# Supplementary material for: Effect of Cross-Linking Density on the Structures and Properties of Carbodiimide-Treated Gelatin Matrices as Limbal Stem Cell Niches
Source: MDPI journal article supplement (doi:10.3390/ijms19113294), 2018-10-23

## Supplementary Information

**Figure S1.** Schematic illustration of EDC cross-linking of gelatin.

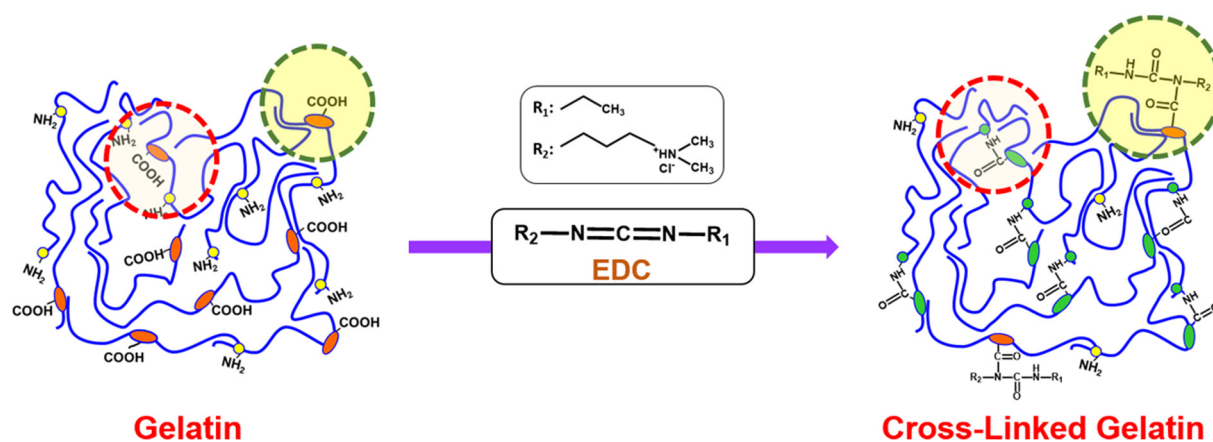

**Figure S2.** Phase-contrast micrographs of SIRC cultures after a 3-day exposure to gelatin samples cross-linked with 15 mM of EDC: (a) before and (b) after thorough washing of material samples with deionized water to remove unreacted EDC. Scale bars: 200  $\mu\text{m}$ .

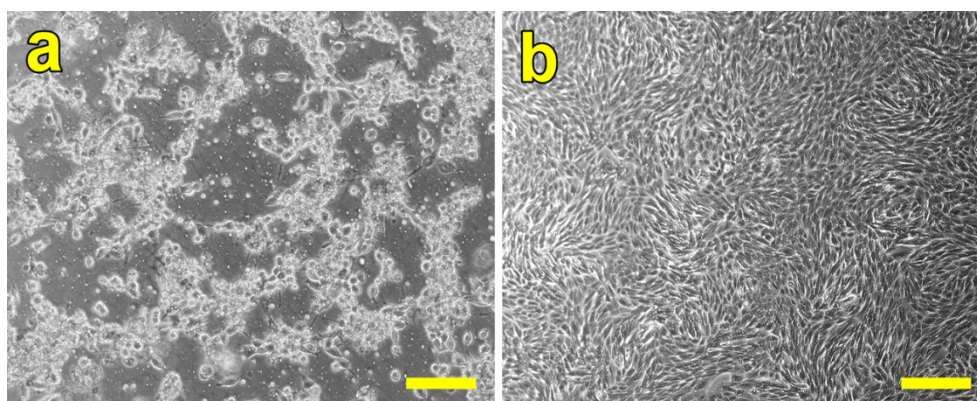

Supplement: s1 [file s1]
